---

# Predictability of Genetic Interactions from Functional Gene Modules

---

Jonathan H. Young  
Institute for Computational Engineering and Sciences,  
Center for Systems and Synthetic Biology,  
The University of Texas at Austin,  
Austin, Texas, USA

Edward M. Marcotte\*  
Center for Systems and Synthetic Biology,  
Institute for Cellular and Molecular Biology,  
Department of Molecular Biosciences,  
The University of Texas at Austin,  
Austin, Texas, USA

\*To whom correspondence should be addressed: [marcotte@icmb.utexas.edu](mailto:marcotte@icmb.utexas.edu)

# Predictability of Genetic Interactions from Functional Gene Modules

## Abstract

*Characterizing genetic interactions is crucial to understanding cellular and organismal response to gene-level perturbations. Such knowledge can inform the selection of candidate disease therapy targets. Yet experimentally determining whether genes interact is technically non-trivial and time-consuming. High-fidelity prediction of different classes of genetic interactions in multiple organisms would substantially alleviate this experimental burden. Under the hypothesis that functionally-related genes tend to share common genetic interaction partners, we evaluate a computational approach to predict genetic interactions in *Homo sapiens*, *Drosophila melanogaster*, and *Saccharomyces cerevisiae*. By leveraging knowledge of functional relationships between genes, we cross-validate predictions on known genetic interactions and observe high-predictive power of multiple classes of genetic interactions in all three organisms. Additionally, our method suggests high-confidence candidate interaction pairs that can be directly experimentally tested. A web application is provided for users to query genes for predicted novel genetic interaction partners. Finally, by subsampling the known yeast genetic interaction network, we found that novel genetic interactions are predictable even when knowledge of currently known interactions is minimal.*

**Keywords**— epistasis, gene network, synthetic lethality, data mining, drug target

## Introduction

Determining the genetic interactions in an organism provides a basis for understanding how the role of a gene is influenced by the action of any other gene. By definition, two or more genes interact when combining variants of each gene produces a significantly pronounced phenotype when compared to the phenotypes of individual variants [Mani et al., 2008, Baryshnikova et al., 2013]. The applications of exploiting such interactions extend to drug target discovery. Strategies such as targeting genes that interact with cancer-specific mutations have been proposed and reviewed extensively [Ashworth et al., 2011, Fece de la Cruz et al., 2015] and have led to clinical trials [Fong et al., 2009]. Because experimental determination of genetic interactions involves examining all possible pairs from a group of genes, practical difficulties arise when a comprehensive interaction

## Predictability of Genetic Interactions from Functional Gene Modules

---

28 map of an entire organism is desired. Multicellular organisms present the challenge of various  
29 differentiated cell types, each having potentially differing genetic interactions. Moreover, there  
30 are different kinds of genetic interactions, ranging from those based on growth effects to other  
31 phenotypic effects. There exists a need to either reduce the search space for testing genetic  
32 interactions or to reliably predict them. Here, we evaluate a computational approach to predict and  
33 validate different types genetic interactions across multiple organisms.

34 Previous studies to predict genetic interactions leveraged existing sources of biological  
35 information. Integration of biological features in yeast (i.e. gene co-expression, protein interaction  
36 and function) and their associated network topological properties guided the training of probabilistic  
37 decision trees to predict synthetic sick or lethal (SSL) interactions [Wong et al., 2004]. In a similar  
38 vein, an ensemble classifier was trained on a set of 152 genetic interaction-independent features to  
39 predict SSL in yeast [Pandey et al., 2010]. Compiling multiple biological features has also been  
40 extended to more than one organism. By considering the orthologous gene pairs among yeast, fly  
41 and worm, features such as functional annotation were used to train a logistic regression model to  
42 predict a genome-wide map of genetic interactions [Zhong and Sternberg, 2006]. Alternatively,  
43 studies have also explored network-based approaches for genetic interaction prediction. Novel SSL  
44 interactions were predicted by way of a diffusion kernel on a network of known SSL gene pairs  
45 [Qi et al., 2008]. Interrogating functional gene networks that were constructed from integration of  
46 biological data from literature have proven useful in predicting modifier genes in yeast and worm  
47 [Lee et al., 2010]. Many of these approaches have focused on a single genetic interaction type in a  
48 single organism.

49 Here, we examine an algorithm to predict multiple types of genetic interactions across  
50 diverse organisms based on the hypothesis that genes strongly participating in shared functions  
51 also share common genetic interaction partners. Our approach relies on a functional gene network

## Predictability of Genetic Interactions from Functional Gene Modules

---

52 for a given organism and knowledge of known genetic interactions of a particular type. We  
53 tested our approach on three organisms - human (*Homo sapiens*), fly (*Drosophila melanogaster*),  
54 and yeast (*Saccharomyces cerevisiae*) - and found predictability across different types of genetic  
55 interactions. We also investigated how some interactions are enriched in yeast and human gene  
56 modules, specifically protein complexes, and the degree to which genetic interactions need to  
57 experimentally determined before enrichment can be found.

## 58 **Materials and Methods**

59 For various classes of genetic interactions in human, fly, and yeast, a list of genes and each of their  
60 known genetic interaction partners were assembled. A gene and its known interaction partners  
61 are collectively referred to as a “seed set.” Receiver operating characteristic (ROC) analysis  
62 was performed to quantify whether the interaction partners of any given gene are clustered in the  
63 organism’s functional gene network. Specifically, for every group of interaction partners of a gene,  
64 a score vector consists of entries that are sums of functional network edge weights between each  
65 gene in the network to the interaction partners. Because there are no self-edges in the network,  
66 leave-one-out cross-validation is carried out on the known interaction partners. An accompanying  
67 label vector indicates whether each gene in the network is indeed an interaction partner. The two  
68 vectors yield a ROC curve and the corresponding area under the curve (AUC). A seed set’s AUC  
69 is the measure of how tightly connected the interaction partners are in the functional network and  
70 therefore how predictive the seed set is for novel interactions [Lee et al., 2010]. None of the known  
71 genetic interactions used for prediction were contained in the functional gene network.

72 Enrichment of genetic interactions within yeast and human protein complexes was calculated  
73 with a binomial model defined as  $P(X = k) = \binom{n}{k} p^k (1 - p)^{n-k}$ , where the background probability

## Predictability of Genetic Interactions from Functional Gene Modules

---

74  $p$  equals the proportion of all possible gene pairs that are genetically interacting. The number of  
75 trials  $n$  is the number of possible gene pairs in the complex, and  $k$  equals the number of interacting  
76 pairs in the protein complex.

### 77 **Statistical Analysis**

78 If  $k$  is the number of genetic interactions within a protein complex, then the corresponding  $p$ -value  
79 is  $P(X \geq k)$  according to a binomial model as previously described, with control of FDR at  
80 5% through the Benjamini-Hochberg procedure [Benjamini and Hochberg, 1995]. Seed sets with  
81  $AUC \geq 0.9$  were considered highly predictive of novel genetic interactions.

### 82 **Data Availability**

83 All genetic interactions were downloaded from version 3.4.130 of BIOGRID [Stark et al., 2006].  
84 Organism-specific functional gene networks were downloaded for human [Lee et al., 2011], fly  
85 [Shin et al., 2015], and yeast [Lee et al., 2007]. Previous studies served as sources of protein  
86 complexes for yeast and human [Hart et al., 2007, Ruepp et al., 2010]. Python code using the  
87 Matplotlib [Hunter et al., 2007], scikit-learn [Pedregosa et al., 2011], and *mygene* [Wu et al., 2012]  
88 libraries is available at [https://bitbucket.org/youngjh/genetic\\_interact](https://bitbucket.org/youngjh/genetic_interact). All network  
89 visualizations were produced in Cytoscape [Shannon et al., 2003]. A supplementary web page at  
90 [http://marcottelab.org/Genetic\\_Interact/](http://marcottelab.org/Genetic_Interact/) allows users to query a gene of interest. If the  
91 gene has known genetic interaction partners that are predictive, then the functional network cluster  
92 is displayed. Raw data files listing the seed sets with  $AUC \geq 0.7$  are also available.

---

## Predictability of Genetic Interactions from Functional Gene Modules

### 93 **Results**

94 We sought to determine whether clusters of functionally related genes, for example genes *A-E* in  
95 Figure 1, are predictive of genetic interactions. In this example, genes *A* and *C-E* are known to share  
96 genetic interactions with gene *X*, and our hypothesis would suggest gene *B* as a novel interaction  
97 partner of *X*. Our method identifies predictive clusters by leave-one-out cross-validation and  
98 receiver operating characteristic (ROC) analysis; when applied to the network in Figure 1, each of  
99 genes *A* and *C-E* are individually withheld as known interaction partners one at a time and predicted  
100 back with high recall. Subsequently, gene *B* is a novel high-confidence predicted interaction partner  
101 of *X*. The approach described here was evaluated for several classes of phenotypic and growth-based  
102 genetic interactions in human, fly and yeast.

### 103 **The human functional gene network is predictive for phenotype-based genetic** 104 **interactions**

105 As shown in Figure 2A, our method demonstrated high performance in predicting phenotypic  
106 enhancing and suppressing human gene pairs. In these interactions, a double mutant has an  
107 enhanced or suppressed phenotype (other than growth) in comparison to either of the single mutants.  
108 The plots for phenotypic enhancement and suppression in Figure 2A display the performance of  
109 seed sets, each of which are defined as a group of known phenotypic enhancing or suppressing  
110 partners of a particular gene. There are 238 phenotypic enhancement seed sets, of which 30 have  
111  $AUC \geq 0.9$ . Similarly, 36 of 215 phenotypic suppression seed sets have  $AUC \geq 0.9$ . The AUC  
112 is the area under the receiver operating characteristic (ROC) curve that measures how well the  
113 known interaction partners rank in our leave-one-out cross-validation scheme. Those that are not  
114 predictive are the ones with  $AUC = 0.5$ , indicating that their predictability is no better than random.

## Predictability of Genetic Interactions from Functional Gene Modules

---

115 For the most part, seed sets are either at least moderately predictive, or not at all.

116 Shown in Figure 2B are illustrative seed sets with high predictability that form well-defined  
117 clusters in the human functional gene network, HumanNet. For clarity, only functional network  
118 edges with log-likelihood scores (LLS) above 3.0 are shown. Furthermore, HumanNet genes are  
119 shown only if they connect to at least 2 of the known genetic interaction partners. The seed set  
120 consisting of the SNW domain containing 1 in phenotypic enhancement with members of the  
121 SMAD family and nuclear receptor coactivators yielded an AUC of 0.91. The prediction is that the  
122 SNW domain containing 1 also phenotypically enhances with other members of the SMAD family  
123 along with members of the forkhead box. In the phenotypic suppression case, we find that known  
124 phenotypic suppressors of caspase 2 are tightly functionally linked with members of the BCL2-like  
125 family, among other genes. With a resulting AUC of 0.90, these BCL2-like genes are expected to  
126 participate in phenotypic suppression with caspase 2.

### 127 **Fly phenotypic enhancement and suppression interactions are predicted from** 128 **functional net clusters**

129 Similar to the human case, the fly functional network FlyNet is particularly predictive of phenotypic  
130 enhancement and suppression, as shown in Figure 3. A larger proportion of the seed sets are  
131 predictive than in the human case. For phenotypic enhancement, 322 out of 754 seed sets had  
132  $AUC \geq 0.9$ , and 398 phenotypic suppression seed sets (out of 818) met the same threshold.  
133 Figure 3B shows a well-defined gene cluster ( $AUC = 0.94$ ) containing phenotypic enhancement  
134 interaction partners of seven up. From this cluster, genes involved in the sevenless signaling and  
135 the Drosophila epidermal growth factor receptor signal transduction pathways achieved high recall,  
136 and neighbor genes also involved in the same signaling pathways are expected to phenotypically  
137 enhance seven up. Turning to phenotypic suppression, several Enhancer of split genes are tightly

## Predictability of Genetic Interactions from Functional Gene Modules

---

138 clustered (AUC = 0.98) with known phenotypic suppressors of hairy that include the *achaete-scute*  
139 complex, thereby implicating them as additional, novel phenotypic suppressors of hairy.

### 140 **High-confidence predictability is found in human, fly and yeast**

141 The full range of various genetic interaction classes that were analyzed from BIOGRID are listed  
142 in Table 1. Genetic interactions were generally based on phenotypic effects or growth and lethality  
143 measurements. Each entry in Table 1 lists the number of predictive seed sets having  $AUC \geq 0.9$  of  
144 out the total examined. In human, our method performed well primarily for phenotypic enhance-  
145 ment and suppression as described above, but did not offer predictability for the dosage lethality  
146 and synthetic growth defect and rescue interactions determined to date. For fly, most of the known  
147 interactions fall into the phenotypic enhancement and suppression categories, for which high pre-  
148 dictability was observed. Although a moderate number of fly dosage rescue interactions are known,  
149 no predictive seed sets were found. In both human and fly, several classes of interactions have not  
150 been extensively determined and thus were untested in our prediction scheme.

151 Our method also performed well in most of the interaction categories for *S. cerevisiae* (Table  
152 1, Supplementary Figure S1). Notably, negative and positive genetic interactions fared poorly as  
153 few predictive seed sets were identified, even though most of the experimentally determined  
154 interactions in yeast fall into these categories.

### 155 **Protein complexes inform trends of genetic interaction predictability**

156 With genetic interactions predicted across multiple organisms, it was natural to investigate their  
157 evolutionary conservation. In particular, if a protein complex were enriched in genetic interactions,  
158 then perhaps a homologous protein complex would also exhibit similar enrichment. We found  
159 enrichment of various types of interactions within yeast protein complexes, but none thus far



## Predictability of Genetic Interactions from Functional Gene Modules

---

160 for human. Therefore, instead the problem shifted to identifying the degree to which genetic  
161 interactions must be determined in order to find enrichment, and therefore predictability. Using  
162 yeast as a test case, simulations successively withheld increasing proportions of genetic interactions,  
163 with enrichment within yeast protein complexes computed at each point. The interaction types  
164 considered were negative and positive genetic, and synthetic growth defect and lethality. As shown  
165 in Figure 4, when withholding genes with a genetic interaction degree (the number of interacting  
166 partners of a certain gene) of more than 5, corresponding to withholding >90% of synthetic growth  
167 defect and >80% of synthetic lethality pairs, then an immediate drop-off in enrichment resulted. No  
168 such behavior was observed for negative and positive genetic interactions, for which enrichment  
169 linearly decreased as a function of the withheld proportion. Similarly, when removing interacting  
170 pairs at random, there was a steady decrease in the number of significantly enriched complexes  
171 among all types. Finally, when withholding pairs under a degree cutoff, there was also no point  
172 beyond which enrichment failed to be found (Supplementary Figure S2).

## 173 Discussion

174 Our results demonstrate that various classes of genetic interactions in different organisms can be  
175 successfully predicted based on the hypothesis that functional gene clusters tend to share genetic  
176 interaction partners. For *S. cerevisiae* in particular, predictability was obtained whether the genetic  
177 interaction type was based on growth effects or non-growth phenotype-based measurements (i.e.  
178 phenotypic suppression). Interestingly, our method did not yield predictability for negative and  
179 positive genetic interactions, which happen to be the interaction types for which most of the pairs  
180 have been tested [Costanzo et al., 2010]. While the range of predictable genetic interaction classes  
181 for human and fly were limited to phenotypic enhancement and suppression, we believe that this

## Predictability of Genetic Interactions from Functional Gene Modules

---

182 is probably due to the sparsity of known genetic interactions for these organisms. In this study, the  
183 source of known genetic interactions, BIOGRID, had over 150000 yeast gene pairs but only ~2800  
184 pairs for fly and ~1500 for human. As shown in Table 1, many types of genetic interactions could  
185 simply not be tested for fly and human.

186 This sparseness of experimentally-determined genetic interactions, especially in human, led  
187 to the lack of enrichment in gene modules such as protein complexes. In our simulations of  
188 withholding genetic interacting pairs, we expected that regardless of the interaction type, there  
189 would be a point after which no enrichment would be found. Thus, it was surprising that negative  
190 and positive genetic interactions exhibited a linear decrease in enrichment, regardless of how the  
191 pairs were withheld (by degree or at random). On the other hand, the enrichment signal in synthetic  
192 growth defect and lethality is sensitive to the interaction degree, as there was a steep drop-off when  
193 most of the interaction pairs were withheld. In the negative and positive genetic networks, there  
194 appears to sufficient genetic interaction density such that even when high numbers of interacting  
195 pairs are withheld, enrichment under a binomial model can still be found. By extrapolating to the  
196 human case, a modest increase in the number of screened human gene pairs is likely to dramatically  
197 increase the ability to predict additional genetic interactions, especially for synthetic growth defect  
198 and lethality where the genes have multiple interaction partners.

199 Similar to previous genetic interaction prediction approaches [Qi et al., 2008, Zhong and  
200 Sternberg, 2006], our algorithm requires knowledge of known experimentally determined genetic  
201 interactions. While other studies proceed without such requirements, the assimilation of a host of  
202 biologically annotated features are still necessary for their prediction method [Pandey et al., 2010,  
203 Wong et al., 2004]. In contrast to the aforementioned studies, our methodology systematically  
204 examined more than one class of genetic interaction and was successfully applied to multiple  
205 eukaryotic organisms, thereby generalizing results from a previous study by Lee et al. [Lee

## Predictability of Genetic Interactions from Functional Gene Modules

---

206 et al., 2010]. Since the detection of tightly connected sets of nodes in a network is central to  
207 our method, further avenues for exploration perhaps include investigating methods such as graph  
208 clustering [Enright et al., 2002] or community detection algorithms [Fortunato, 2010], though these  
209 algorithms lack built-in validation. It would also be interesting to explore using tissue-specific  
210 gene networks instead of a single integrated functional gene network for more targeted predictions  
211 [Greene et al., 2015].

212 As one major goal of any genetic interaction prediction is to at least narrow down the  
213 search space for experimentally testing genetically interacting pairs, our predictions are specifically  
214 testable experimentally, perhaps through CRISPR-Cas9 for human cells [Wong et al., 2016].  
215 We also contribute to available prediction methodologies for suggesting genetic interactions as  
216 candidate therapeutic targets. Ultimately, we demonstrate the power of leveraging knowledge of  
217 known genetic interactions and integrated biological information in functional gene networks to  
218 predict novel genetic interactions from single-cell to multicellular organisms.

## 219 **Acknowledgments**

220 E.M.M. acknowledges funding from the National Institutes of Health, the National Science Foun-  
221 dation, the Cancer Prevention and Research Institute of Texas, and the Welch Foundation (F1515).

222 The authors thank Kevin Drew for assistance with web server setup.

223 *Conflict of interest:* none declared.

---

## Predictability of Genetic Interactions from Functional Gene Modules

---

### 224 **References**

- 225 Alan Ashworth, Christopher J Lord, and Jorge S Reis-Filho. Genetic interactions in cancer pro-  
226 gression and treatment. *Cell*, 145(1):30--38, 2011.
- 227 Anastasia Baryshnikova, Michael Costanzo, Chad L Myers, Brenda Andrews, and Charles Boone.  
228 Genetic interaction networks: toward an understanding of heritability. *Annual Review of Ge-*  
229 *nomics and Human Genetics*, 14:111--133, 2013.
- 230 Yoav Benjamini and Yosef Hochberg. Controlling the false discovery rate: a practical and powerful  
231 approach to multiple testing. *Journal of the Royal Statistical Society. Series B (Methodological)*,  
232 pages 289--300, 1995.
- 233 Michael Costanzo, Anastasia Baryshnikova, Jeremy Bellay, Yungil Kim, Eric D Spear, Carolyn S  
234 Sevier, Huiming Ding, Judice LY Koh, Kiana Toufighi, Sara Mostafavi, et al. The genetic  
235 landscape of a cell. *Science*, 327(5964):425--431, 2010.
- 236 Anton J Enright, Stijn Van Dongen, and Christos A Ouzounis. An efficient algorithm for large-scale  
237 detection of protein families. *Nucleic Acids Research*, 30(7):1575--1584, 2002.
- 238 Ferran Fec de la Cruz, Bianca V Gapp, and Sebastian MB Nijman. Synthetic lethal vulnerabilities  
239 of cancer. *Annual Review of Pharmacology and Toxicology*, 55:513--531, 2015.
- 240 Peter C Fong, David S Boss, Timothy A Yap, Andrew Tutt, Peijun Wu, Marja Mergui-Roelvink,  
241 Peter Mortimer, Helen Swaisland, Alan Lau, Mark J O'Connor, et al. Inhibition of poly (adp-ri-  
242 bose) polymerase in tumors from brca mutation carriers. *New England Journal of Medicine*, 361  
243 (2):123--134, 2009.
- 244 Santo Fortunato. Community detection in graphs. *Physics Reports*, 486(3):75--174, 2010.
- 245 Casey S Greene, Arjun Krishnan, Aaron K Wong, Emanuela Ricciotti, Rene A Zelaya, Daniel S  
246 Himmelstein, Ran Zhang, Boris M Hartmann, Elena Zaslavsky, Stuart C Sealfon, et al. Un-  
247 derstanding multicellular function and disease with human tissue-specific networks. *Nature*  
248 *Genetics*, 47(6):569--576, 2015.
- 249 G Traver Hart, Insuk Lee, and Edward M Marcotte. A high-accuracy consensus map of yeast  
250 protein complexes reveals modular nature of gene essentiality. *BMC Bioinformatics*, 8(1):1,  
251 2007.
- 252 John D Hunter et al. Matplotlib: A 2d graphics environment. *Computing in Science and Engineering*,  
253 9(3):90--95, 2007.
- 254 Insuk Lee, Zhihua Li, and Edward M Marcotte. An improved, bias-reduced probabilistic functional  
255 gene network of baker's yeast, *saccharomyces cerevisiae*. *PLoS One*, 2(10):e988, 2007.

## Predictability of Genetic Interactions from Functional Gene Modules

---

- 256 Insuk Lee, Ben Lehner, Tanya Vavouri, Junha Shin, Andrew G Fraser, and Edward M Marcotte.  
257 Predicting genetic modifier loci using functional gene networks. *Genome Research*, 20(8):  
258 1143--1153, 2010.
- 259 Insuk Lee, U Martin Blom, Peggy I Wang, Jung Eun Shim, and Edward M Marcotte. Prioritizing  
260 candidate disease genes by network-based boosting of genome-wide association data. *Genome*  
261 *Research*, 21(7):1109--1121, 2011.
- 262 Ramamurthy Mani, Robert P St Onge, John L Hartman, Guri Giaever, and Frederick P Roth. Defin-  
263 ing genetic interaction. *Proceedings of the National Academy of Sciences*, 105(9):3461--3466,  
264 2008.
- 265 Gaurav Pandey, Bin Zhang, Aaron N Chang, Chad L Myers, Jun Zhu, Vipin Kumar, and Eric E  
266 Schadt. An integrative multi-network and multi-classifier approach to predict genetic interactions.  
267 *PLoS Comput Biol*, 6(9):e1000928, 2010.
- 268 Fabian Pedregosa, Gaël Varoquaux, Alexandre Gramfort, Vincent Michel, Bertrand Thirion, Olivier  
269 Grisel, Mathieu Blondel, Peter Prettenhofer, Ron Weiss, Vincent Dubourg, et al. Scikit-learn:  
270 Machine learning in python. *The Journal of Machine Learning Research*, 12:2825--2830, 2011.
- 271 Yan Qi, Yasir Suhail, Yu-yi Lin, Jef D Boeke, and Joel S Bader. Finding friends and enemies in  
272 an enemies-only network: a graph diffusion kernel for predicting novel genetic interactions and  
273 co-complex membership from yeast genetic interactions. *Genome Research*, 18(12):1991--2004,  
274 2008.
- 275 Andreas Ruepp, Brigitte Waegele, Martin Lechner, Barbara Brauner, Irmtraud Dunger-Kaltenbach,  
276 Gisela Fobo, Goar Frishman, Corinna Montrone, and H-Werner Mewes. Corum: the compre-  
277 hensive resource of mammalian protein complexes2009. *Nucleic Acids Research*, 38(suppl 1):  
278 D497--D501, 2010.
- 279 Paul Shannon, Andrew Markiel, Owen Ozier, Nitin S Baliga, Jonathan T Wang, Daniel Ramage,  
280 Nada Amin, Benno Schwikowski, and Trey Ideker. Cytoscape: a software environment for  
281 integrated models of biomolecular interaction networks. *Genome Research*, 13(11):2498--2504,  
282 2003.
- 283 Junha Shin, Sunmo Yang, Eiru Kim, Chan Yeong Kim, Hongseok Shim, Ara Cho, Hyojin Kim,  
284 Sohyun Hwang, Jung Eun Shim, and Insuk Lee. Flynet: a versatile network prioritization server  
285 for the drosophila community. *Nucleic Acids Research*, page gkv453, 2015.
- 286 Chris Stark, Bobby-Joe Breitkreutz, Teresa Reguly, Lorrie Boucher, Ashton Breitkreutz, and Mike  
287 Tyers. Biogrid: a general repository for interaction datasets. *Nucleic Acids Research*, 34(suppl  
288 1):D535--D539, 2006.

## Predictability of Genetic Interactions from Functional Gene Modules

---

- 289 Alan SL Wong, Gigi CG Choi, Cheryl H Cui, Gabriela Pregernig, Pamela Milani, Miriam Adam,  
290 Samuel D Perli, Samuel W Kazer, Aleth Gaillard, Mario Hermann, et al. Multiplexed barcoded  
291 crispr-cas9 screening enabled by combigem. *Proceedings of the National Academy of Sciences*,  
292 113(9):2544--2549, 2016.
- 293 Sharyl L Wong, Lan V Zhang, Amy HY Tong, Zhijian Li, Debra S Goldberg, Oliver D King,  
294 Guillaume Lesage, Marc Vidal, Brenda Andrews, Howard Bussey, et al. Combining biological  
295 networks to predict genetic interactions. *Proceedings of the National Academy of Sciences of*  
296 *the United States of America*, 101(44):15682--15687, 2004.
- 297 Chunlei Wu, Ian MacLeod, and Andrew I Su. Biogps and mygene. info: organizing online,  
298 gene-centric information. *Nucleic Acids Research*, page gks1114, 2012.
- 299 Weiwei Zhong and Paul W Sternberg. Genome-wide prediction of *c. elegans* genetic interactions.  
300 *Science*, 311(5766):1481--1484, 2006.

## Predictability of Genetic Interactions from Functional Gene Modules

### 301 Tables

|                         | <i>H. sapiens</i> | <i>D. melanogaster</i> | <i>S. cerevisiae</i> |
|-------------------------|-------------------|------------------------|----------------------|
| Dosage Growth Defect    | Not tested        | Not tested             | 176/1146             |
| Dosage Lethality        | 2/108             | Not tested             | 116/689              |
| Dosage Rescue           | 5/65              | 0/144                  | 203/1358             |
| Phenotypic Enhancement  | 30/238            | 322/754                | 287/1958             |
| Phenotypic Suppression  | 36/215            | 398/818                | 223/1751             |
| Synthetic Growth Defect | 4/445             | 1/5                    | 576/3417             |
| Synthetic Rescue        | 2/131             | 5/26                   | 218/2089             |
| Synthetic Lethality     | Not tested        | Not tested             | 221/2706             |
| Negative Genetic        | Not tested        | Not tested             | 65/4618              |
| Positive Genetic        | Not tested        | Not tested             | 55/3586              |

For each fraction, the numerator indicates the number of seed sets with  $AUC \geq 0.9$  and the denominator equals the total number of seed sets tested.

Table 1: **Predictive power of functional networks across different genetic interactions.**

## Predictability of Genetic Interactions from Functional Gene Modules

### 302 Figures

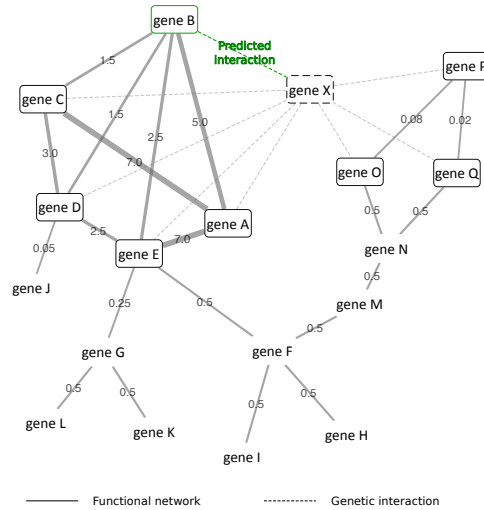

Denoting by  $\Omega$  the set of genetic interaction partners of  $X$ :

$$\begin{bmatrix} \sum_{g \in \Omega} LLS_{g,A} & \sum_{g \in \Omega} LLS_{g,B} & \sum_{g \in \Omega} LLS_{g,C} & \cdots & \sum_{g \in \Omega} LLS_{g,O} & \cdots \\ 1 & 0 & 1 & \cdots & 1 & \cdots \end{bmatrix}$$

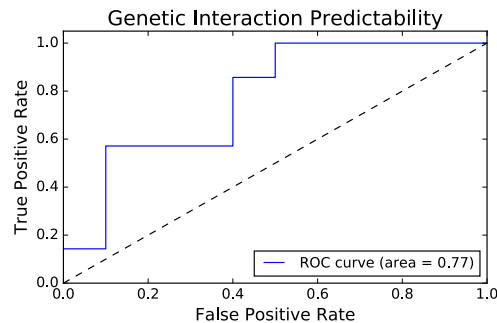

**Figure 1: Genetic Interaction Prediction.** Dashed edges indicate known genetic interactions. Solid edges connect genes that participate in the same biological process, with log-likelihood (LLS) scores as edge weights reflecting the degree of confidence in the genes' shared functionality. Genes  $A$ ,  $C$ - $E$  are genetic interaction partners of gene  $X$  and members of a functional net cluster; then the remaining cluster member, gene  $B$ , is a predicted interaction partner of gene  $X$  as well. Candidate clusters are evaluated by first assigning scores to each gene in the network by summing the edge weights, as shown in the first row of the matrix.  $LLS_{g,A}$  denotes the log-likelihood score between genes  $g$  and  $A$ . The second row is populated with binary labels indicating whether the gene is a known interaction partner of  $X$ . In this fashion, a ROC curve is constructed to yield an AUC.



## Predictability of Genetic Interactions from Functional Gene Modules

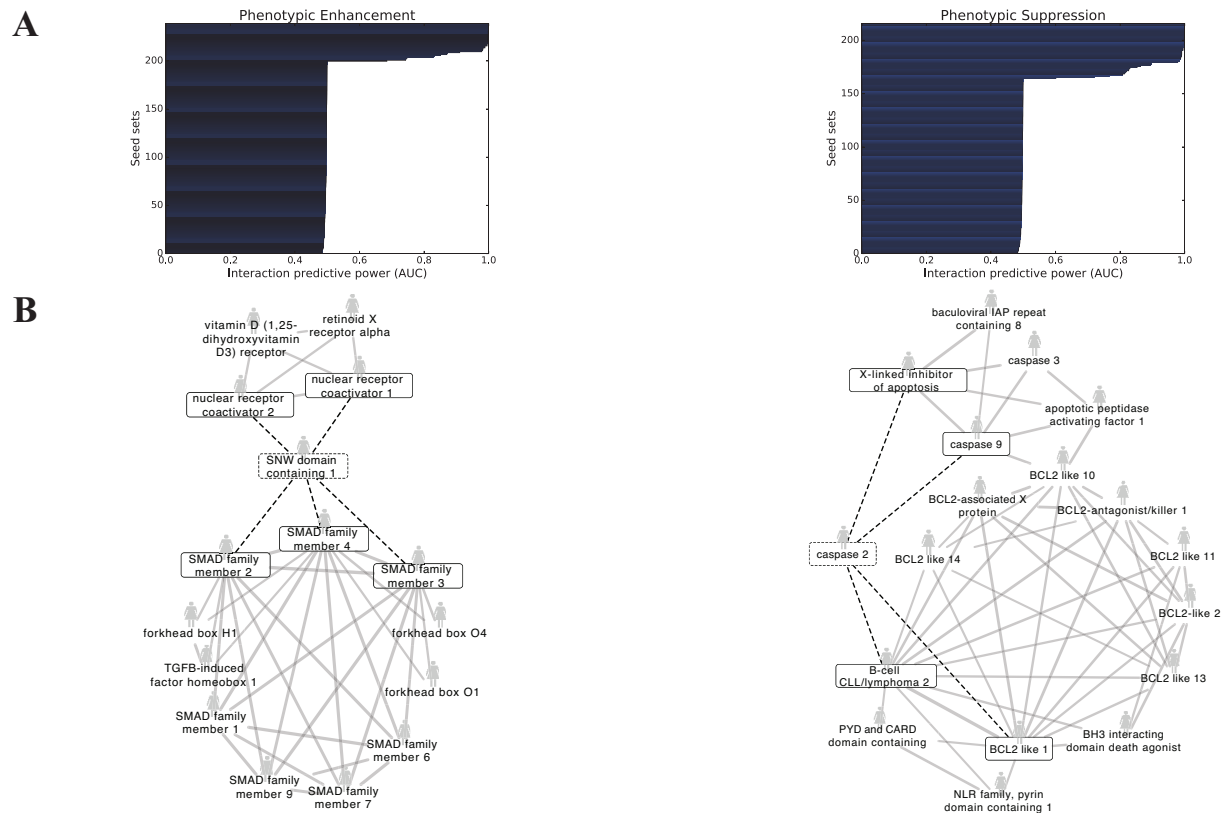

Figure 2: **Predictive functional net clusters yield novel phenotypic enhancing and suppressing human gene pairs.** (A) Each horizontal bar represents the set of known genetic interaction partners of a specific human gene; each of these sets is referred to as a “seed set.” High AUC scores indicate that the interaction partners participate together in a cluster in HumanNet, the human functional gene network. Therefore, other members of the cluster are predicted as novel interaction partners. (B) Shown are two examples of well-defined HumanNet clusters that are highly predictive for phenotypic enhancement (left) and suppression (right), with the known interactions from the seed set denoted by the boxed genes and dashed edges.

## Predictability of Genetic Interactions from Functional Gene Modules

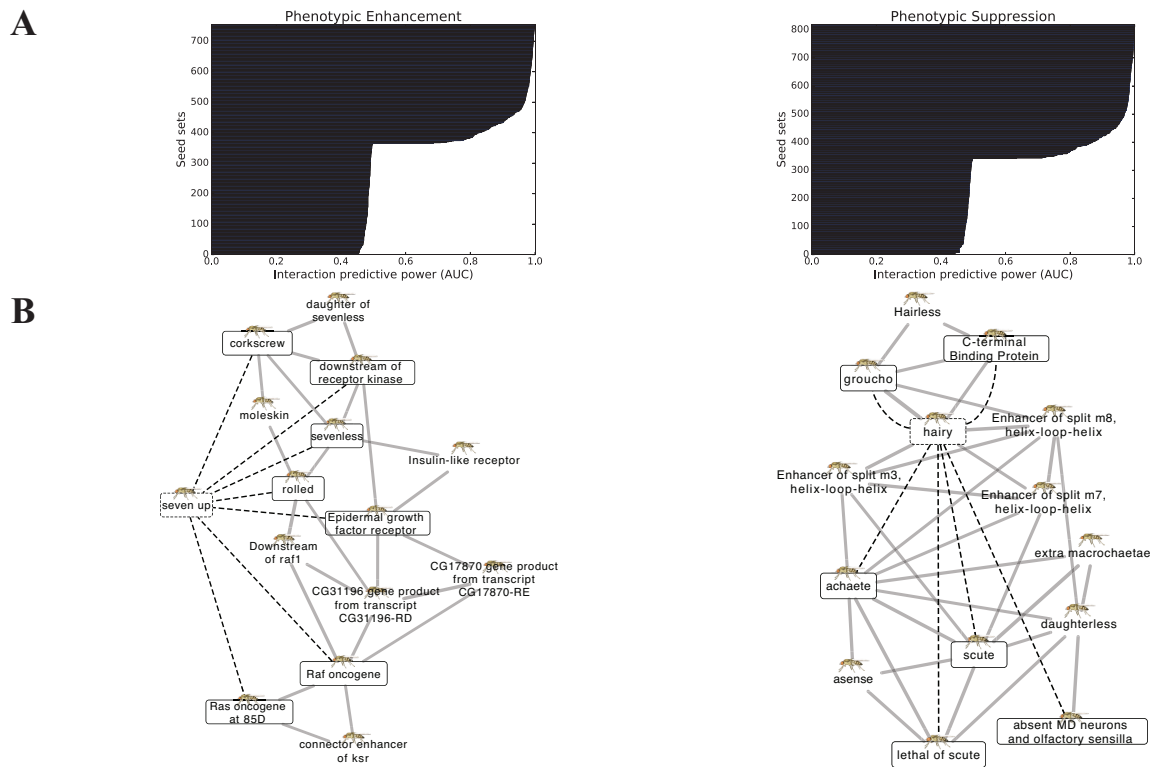

## Predictability of Genetic Interactions from Functional Gene Modules

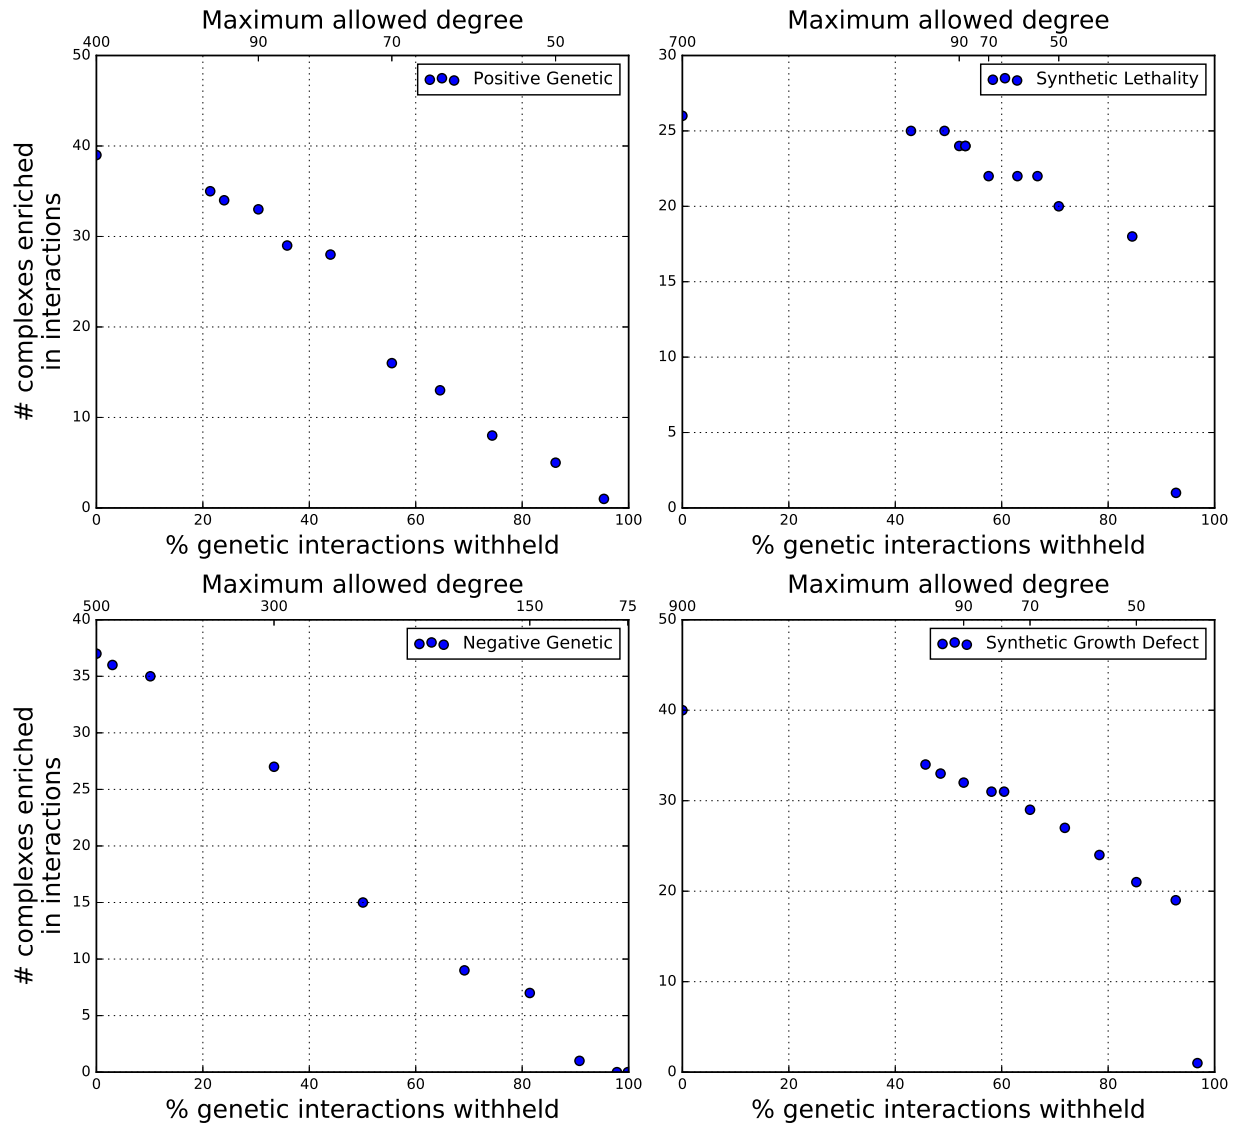

**Figure 4: Predictability of genetic interactions can be found even when known interactions are sparse.** By successively withholding known yeast genetic interactions according to each gene's interaction degree (e.g. number of interaction partners), enrichment and therefore predictability is still detectable when information of known interactions is minimal. This effect is especially pronounced for synthetic growth defect and lethality, provided genes possess sufficiently high interaction degree.
